# Supplementary material for: A recoverable magnetic surface ion-imprinted polymer based on graphene oxide for fast and selective adsorption of Ni(ii) from aqueous solution: experimental and DFT calculations
Source: Royal Society of Chemistry journal article supplement (doi:10.1039/d2nj05223g), 2022-12-02
Supplement: d2nj05223g1.pdf [file d2nj05223g1.pdf]

# Recoverable magnetic surface ion-imprinted polymer based on graphene oxide for fast and selective adsorption of Ni(II) from aqueous solution: Experimental and DFT calculation

Wei-Ye Zhang<sup>a</sup>, Si-Qing Ye<sup>a</sup>, Xin-Tao Yang<sup>a</sup>, Bao-Shi Zhu<sup>a</sup>, Wei-Li Li<sup>a</sup>, Hong-Xing He<sup>\*a</sup> and Xiu-Jun Deng<sup>\*b</sup>

<sup>a</sup> Yunnan Key Laboratory of Food Safety Testing Technology, Kunming University, Kunming 650214, China. E-mail: hxhe0212@kmu.edu.cn

<sup>b</sup> Yunnan Key Laboratory of Metal-Organic Molecular Materials and Device, School of Chemistry and Chemical Engineering, Kunming University, Kunming 650214, China

## Gaussian calculation

Cartesian coordinates at the pbe1pbe/def2TZVP level.

AMPS-Ni(II)

pbe1pbe/def2TZVP scrf=(smd,solvent=water) empiricaldispersion=gd3bj

1 1

|    |             |             |             |
|----|-------------|-------------|-------------|
| C  | 0.47892900  | 0.62729700  | 0.16106400  |
| C  | 1.07656400  | 1.89293000  | -0.44716600 |
| C  | 2.42286500  | 2.22608800  | 0.18690700  |
| C  | 0.11403300  | 3.06766100  | -0.30216600 |
| C  | -2.00707800 | 0.80243500  | -0.33181600 |
| C  | -2.48314200 | 1.00136000  | 1.03977100  |
| C  | -2.15519400 | 0.27110400  | 2.11249700  |
| O  | -2.63106800 | 1.12323800  | -1.30957600 |
| N  | -0.71848300 | 0.12958900  | -0.56550800 |
| S  | 1.61415200  | -0.79048600 | 0.13963200  |
| O  | 2.55915000  | -0.73241800 | 1.24513100  |
| O  | 2.13251800  | -0.93177800 | -1.21921200 |
| O  | 0.56907400  | -1.91678900 | 0.46219000  |
| Ni | -1.00152400 | -1.76576600 | -0.38702900 |
| H  | 0.23117300  | 0.76617200  | 1.22265800  |

|   |             |             |             |
|---|-------------|-------------|-------------|
| H | 1.23393600  | 1.68723300  | -1.52049100 |
| H | 2.78607900  | 3.17773700  | -0.22668000 |
| H | 3.18792300  | 1.46440900  | -0.01671500 |
| H | 2.33018700  | 2.34365100  | 1.27795300  |
| H | 0.59413200  | 3.97814900  | -0.68886300 |
| H | -0.81626100 | 2.93430700  | -0.87082100 |
| H | -0.14109300 | 3.24051300  | 0.75506700  |
| H | -3.25026400 | 1.77771700  | 1.10342500  |
| H | -2.64094800 | 0.46827800  | 3.07192200  |
| H | -1.43664800 | -0.55355500 | 2.09074400  |
| H | -0.55184400 | 0.22620500  | -1.57975000 |

AMPS-Co(II)

pbe1pbe/def2TZVP scrf=(smd,solvent=water) empiricdispersion=gd3bj

1 2

|    |             |             |             |
|----|-------------|-------------|-------------|
| C  | 0.58873900  | 0.56662000  | 0.14723700  |
| C  | 1.48278200  | 1.64086600  | -0.46775300 |
| C  | 2.80994400  | 1.74763500  | 0.27277600  |
| C  | 0.76047400  | 2.98433200  | -0.48676300 |
| C  | -1.82825700 | 1.19457300  | -0.11240500 |
| C  | -2.20459700 | 1.15258200  | 1.30879100  |
| C  | -1.92580600 | 0.16802500  | 2.17133500  |
| O  | -2.45793500 | 1.81438500  | -0.93564700 |
| N  | -0.69594200 | 0.41205900  | -0.56953300 |
| S  | 1.38312700  | -1.07412300 | 0.17089500  |
| O  | 2.22957800  | -1.18927600 | 1.35730800  |
| O  | 2.01708300  | -1.28624000 | -1.13454300 |
| O  | 0.14536700  | -1.98872000 | 0.34125100  |
| Co | -1.37254300 | -1.51332000 | -0.64817400 |
| H  | 0.38994500  | 0.78452300  | 1.20606300  |
| H  | 1.68031400  | 1.32885200  | -1.50864800 |
| H  | 3.40904400  | 2.55704700  | -0.16878800 |
| H  | 3.40161100  | 0.82415500  | 0.21330400  |
| H  | 2.64870100  | 1.98560800  | 1.33627300  |
| H  | 1.44366900  | 3.76140800  | -0.85932300 |
| H  | -0.11872200 | 2.98328700  | -1.14621500 |
| H  | 0.43634000  | 3.27448500  | 0.52568700  |
| H  | -2.84499500 | 1.99026100  | 1.59763600  |
| H  | -2.32146800 | 0.20295500  | 3.18980600  |
| H  | -1.32870300 | -0.70965500 | 1.90289300  |
| H  | -0.56793400 | 0.64927000  | -1.56185000 |

AMPS-Cu(II)

pbe1pbe/def2TZVP scrf=(smd,solvent=water) empiricaldispersion=gd3bj

1 2

|    |             |             |             |
|----|-------------|-------------|-------------|
| C  | 0.67799400  | 0.53653600  | 0.14748200  |
| C  | 1.70411000  | 1.47681300  | -0.48666700 |
| C  | 3.09294500  | 1.31871700  | 0.12014900  |
| C  | 1.22415600  | 2.91962900  | -0.36453600 |
| C  | -1.64541200 | 1.45310000  | -0.14372200 |
| C  | -2.03748700 | 1.47686900  | 1.27477100  |
| C  | -1.88219100 | 0.47146100  | 2.14297800  |
| O  | -2.20358800 | 2.12441500  | -0.98179400 |
| N  | -0.60735400 | 0.55635700  | -0.56822900 |
| S  | 1.25230000  | -1.19400400 | 0.19719800  |
| O  | 2.12430900  | -1.37524800 | 1.35722100  |
| O  | 1.80562600  | -1.51516100 | -1.12413100 |
| O  | -0.06743400 | -1.95907100 | 0.43727700  |
| Cu | -1.55702500 | -1.37519000 | -0.59701200 |
| H  | 0.51513000  | 0.79276400  | 1.20370300  |
| H  | 1.75832700  | 1.20515600  | -1.55562300 |
| H  | 3.76684100  | 2.06351900  | -0.32757800 |
| H  | 3.52293700  | 0.32620400  | -0.06981300 |
| H  | 3.07560100  | 1.48753900  | 1.20816700  |
| H  | 1.97855700  | 3.59623400  | -0.79189900 |
| H  | 0.28251900  | 3.10384300  | -0.90069200 |
| H  | 1.08157300  | 3.19499900  | 0.69271200  |
| H  | -2.57847200 | 2.38532500  | 1.55277200  |
| H  | -2.27718900 | 0.55418600  | 3.15910300  |
| H  | -1.37929000 | -0.46542400 | 1.88298700  |
| H  | -0.45414900 | 0.72748300  | -1.56936900 |

AMPS-Pb(II)

pbe1pbe/def2TZVP scrf=(smd,solvent=water) empiricaldispersion=gd3bj

1 1

|   |            |             |             |
|---|------------|-------------|-------------|
| C | 1.71448700 | 0.09646100  | 0.09252500  |
| C | 2.97075400 | 0.13070000  | -0.78733100 |
| C | 4.07973600 | -0.78124300 | -0.27832300 |
| C | 3.47004600 | 1.56847700  | -0.90082300 |
| C | 0.43643000 | 2.24266400  | -0.06177900 |
| C | 0.47855300 | 2.58641200  | 1.37361300  |
| C | 0.19863200 | 1.76474100  | 2.39150000  |
| O | 0.15936100 | 3.07802000  | -0.90095400 |

|    |             |             |             |
|----|-------------|-------------|-------------|
| N  | 0.64233700  | 0.90696200  | -0.47131600 |
| S  | 1.10016200  | -1.60974800 | 0.33790800  |
| O  | 1.93637500  | -2.26458900 | 1.34685200  |
| O  | 1.03064600  | -2.23644900 | -0.99142100 |
| O  | -0.31606800 | -1.40136900 | 0.90322800  |
| Pb | -1.88676000 | -0.17135400 | -0.21619200 |
| H  | 1.94992400  | 0.44157500  | 1.10877800  |
| H  | 2.66050100  | -0.21820700 | -1.78834600 |
| H  | 4.97091500  | -0.65245900 | -0.90983200 |
| H  | 3.80005900  | -1.84238100 | -0.30641700 |
| H  | 4.35860700  | -0.52642200 | 0.75643200  |
| H  | 4.39155400  | 1.59239300  | -1.50075600 |
| H  | 2.74564000  | 2.23421400  | -1.39133100 |
| H  | 3.70288900  | 1.98268800  | 0.09343300  |
| H  | 0.65739700  | 3.65135100  | 1.54614200  |
| H  | 0.16804500  | 2.14817000  | 3.41495200  |
| H  | -0.02794000 | 0.70269400  | 2.25568700  |
| H  | 0.66342400  | 0.89045700  | -1.49627600 |

AMPS-Zn(II)

1 1

pbe1pbe/def2TZVP scrf=(smd,solvent=water) empiricaldispersion=gd3bj

|    |             |             |             |
|----|-------------|-------------|-------------|
| C  | 0.81950800  | 0.41670000  | 0.13607800  |
| C  | 2.02700300  | 1.13355700  | -0.47829700 |
| C  | 3.32609600  | 0.81237900  | 0.24939600  |
| C  | 1.78261000  | 2.63933600  | -0.50356700 |
| C  | -1.26364700 | 1.77310900  | -0.15216400 |
| C  | -1.62064600 | 1.88092100  | 1.27687300  |
| C  | -1.68544200 | 0.85727500  | 2.13457900  |
| O  | -1.74623000 | 2.51908200  | -0.98304500 |
| N  | -0.41760700 | 0.72704100  | -0.56703300 |
| S  | 1.04997400  | -1.40044900 | 0.14940400  |
| O  | 1.86131500  | -1.73376600 | 1.32789600  |
| O  | 1.60623800  | -1.78447700 | -1.15792200 |
| O  | -0.36455700 | -1.94976000 | 0.32800600  |
| Zn | -1.94683200 | -1.11657300 | -0.49920000 |
| H  | 0.71483000  | 0.67880900  | 1.19795600  |
| H  | 2.10890800  | 0.77232500  | -1.51861200 |
| H  | 4.14922000  | 1.38294400  | -0.20535400 |
| H  | 3.58583500  | -0.25289800 | 0.19654700  |
| H  | 3.26295500  | 1.09793300  | 1.31168000  |

|   |             |             |             |
|---|-------------|-------------|-------------|
| H | 2.67529800  | 3.15086600  | -0.89258500 |
| H | 0.93944500  | 2.92191900  | -1.14978600 |
| H | 1.58615200  | 3.02585000  | 0.50971900  |
| H | -1.95211900 | 2.88213300  | 1.56578100  |
| H | -2.04936300 | 1.01243800  | 3.15401200  |
| H | -1.39830500 | -0.16422500 | 1.86360600  |
| H | -0.26125100 | 0.81870800  | -1.57505900 |

AMPS-Cd(II)

pbe1pbe/def2TZVP scrf=(smd,solvent=water) empiricaldispersion=gd3bj

1 1

|    |             |             |             |
|----|-------------|-------------|-------------|
| C  | 1.20745500  | 0.23882400  | 0.12726300  |
| C  | 2.50762400  | 0.53769200  | -0.63092700 |
| C  | 3.72154900  | -0.15528500 | -0.02506100 |
| C  | 2.73183100  | 2.04585600  | -0.69658600 |
| C  | -0.41438800 | 2.14126100  | -0.06829200 |
| C  | -0.60329400 | 2.38484400  | 1.37534500  |
| C  | -0.86797800 | 1.44517900  | 2.28842600  |
| O  | -0.73149500 | 2.97655400  | -0.89496700 |
| N  | 0.06245000  | 0.88980300  | -0.50131300 |
| S  | 0.89633900  | -1.56390400 | 0.24941300  |
| O  | 1.75681800  | -2.08665900 | 1.31958900  |
| O  | 1.10660100  | -2.12658300 | -1.09679800 |
| O  | -0.56490300 | -1.67492000 | 0.67525900  |
| Cd | -2.05778000 | -0.48490700 | -0.37427800 |
| H  | 1.28862400  | 0.56316000  | 1.17428500  |
| H  | 2.36315300  | 0.15687900  | -1.65757900 |
| H  | 4.62406200  | 0.14628400  | -0.57677900 |
| H  | 3.64816500  | -1.24927700 | -0.07020500 |
| H  | 3.85674800  | 0.13550100  | 1.02896600  |
| H  | 3.68872300  | 2.25426000  | -1.19744100 |
| H  | 1.94842000  | 2.56954500  | -1.26268100 |
| H  | 2.77757500  | 2.48196300  | 0.31453900  |
| H  | -0.62508800 | 3.44729200  | 1.63297100  |
| H  | -1.08683000 | 1.72607400  | 3.32230200  |
| H  | -0.89020400 | 0.37713200  | 2.04921600  |
| H  | 0.16857500  | 0.92319500  | -1.51933200 |

AMPS-

pbe1pbe/def2TZVP scrf=(smd,solvent=water) empiricaldispersion=gd3bj

-1 1

|   |             |             |             |
|---|-------------|-------------|-------------|
| C | -0.34197200 | 0.35719700  | -0.46274000 |
| C | -1.15174200 | 1.64072600  | -0.23625700 |
| C | -2.39332900 | 1.71168000  | -1.11575500 |
| C | -1.47881000 | 1.92250700  | 1.22478000  |
| C | 2.07858000  | 0.10635800  | -0.68562200 |
| C | 3.39336900  | 0.09097300  | 0.00675000  |
| C | 3.66821900  | 0.61100600  | 1.20553600  |
| O | 2.01344000  | -0.15696300 | -1.88719500 |
| N | 0.99428300  | 0.44026000  | 0.05081900  |
| S | -1.04375700 | -1.19282700 | 0.22255500  |
| O | -2.47739600 | -1.24887200 | -0.16082600 |
| O | -0.23129100 | -2.26503500 | -0.40876200 |
| O | -0.83105200 | -1.10989600 | 1.69445800  |
| H | -0.26543200 | 0.15859100  | -1.54064000 |
| H | -0.46350400 | 2.43197800  | -0.58259100 |
| H | -2.84087700 | 2.71565300  | -1.05638700 |
| H | -2.14636100 | 1.51299600  | -2.17062900 |
| H | -3.14756100 | 0.97830200  | -0.80143500 |
| H | -1.94457200 | 2.91542900  | 1.31931600  |
| H | -0.57785600 | 1.91894400  | 1.85785700  |
| H | -2.17844100 | 1.17692300  | 1.62979900  |
| H | 4.18188600  | -0.37251300 | -0.59366700 |
| H | 4.68164900  | 0.56334200  | 1.61372300  |
| H | 2.91656600  | 1.10935200  | 1.82653700  |
| H | 1.08914600  | 0.49785700  | 1.05994600  |

Table Fukui function of AMPS

| No. | Atom | $f_n$    | $f_{n-1}$ | $f^-$    |
|-----|------|----------|-----------|----------|
| 9   | N    | -0.6767  | -0.44718  | 0.22952  |
| 10  | S    | 2.34318  | 2.31835   | -0.02483 |
| 11  | O    | -1.04797 | -0.90516  | 0.14281  |
| 12  | O    | -1.05515 | -0.9483   | 0.10685  |
| 13  | O    | -1.06011 | -0.96685  | 0.09326  |
