# Supplementary material for: A recoverable magnetic surface ion-imprinted polymer based on graphene oxide for fast and selective adsorption of Ni(ii) from aqueous solution: experimental and DFT calculations
Source: Royal Society of Chemistry journal article supplement (doi:10.1039/d2nj05223g), 2022-12-02
Supplement: d2nj05223g2.pdf [file d2nj05223g2.pdf]

## Supplementary Material

### **Recoverable magnetic surface ion-imprinted polymer based on graphene oxide for fast and selective adsorption of Ni(II) from aqueous solution: Experimental and DFT calculation**

Wei-Ye Zhang<sup>a</sup>, Si-Qing Ye<sup>a</sup>, Xin-Tao Yang<sup>a</sup>, Bao-Shi Zhu<sup>a</sup>, Wei-Li Li<sup>a</sup>, Hong-Xing He<sup>\*a</sup> and Xiu-Jun Deng<sup>\*b</sup>

<sup>a</sup> Yunnan Key Laboratory of Food Safety Testing Technology, Kunming University, Kunming 650214, China. E-mail: hxhe0212@kmu.edu.cn

<sup>b</sup> Yunnan Key Laboratory of Metal-Organic Molecular Materials and Device, School of Chemistry and Chemical Engineering, Kunming University, Kunming 650214, China

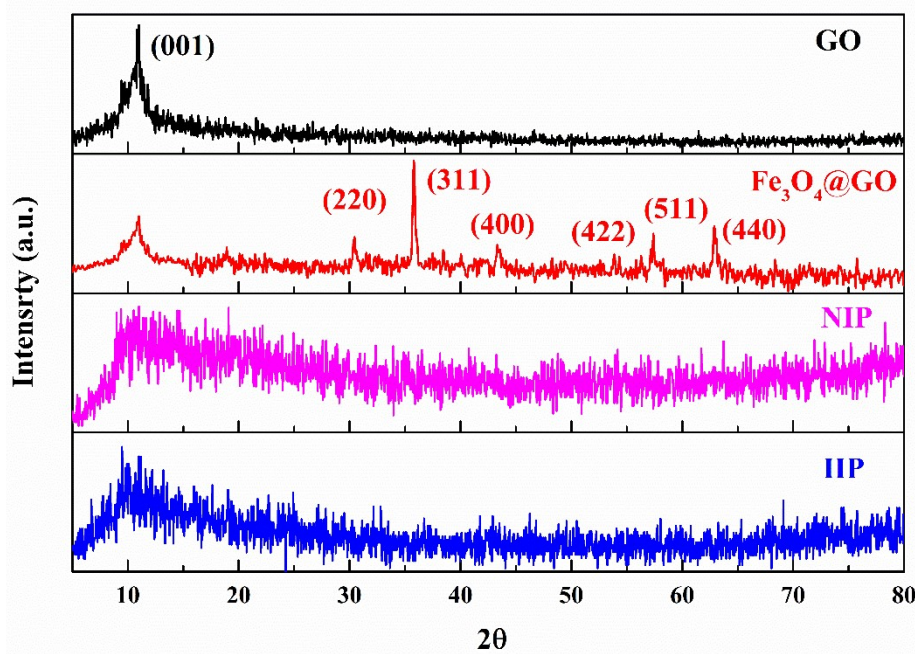

**Fig. S1.** XRD patterns of GO, Fe<sub>3</sub>O<sub>4</sub>@GO, NIP, and IIP.

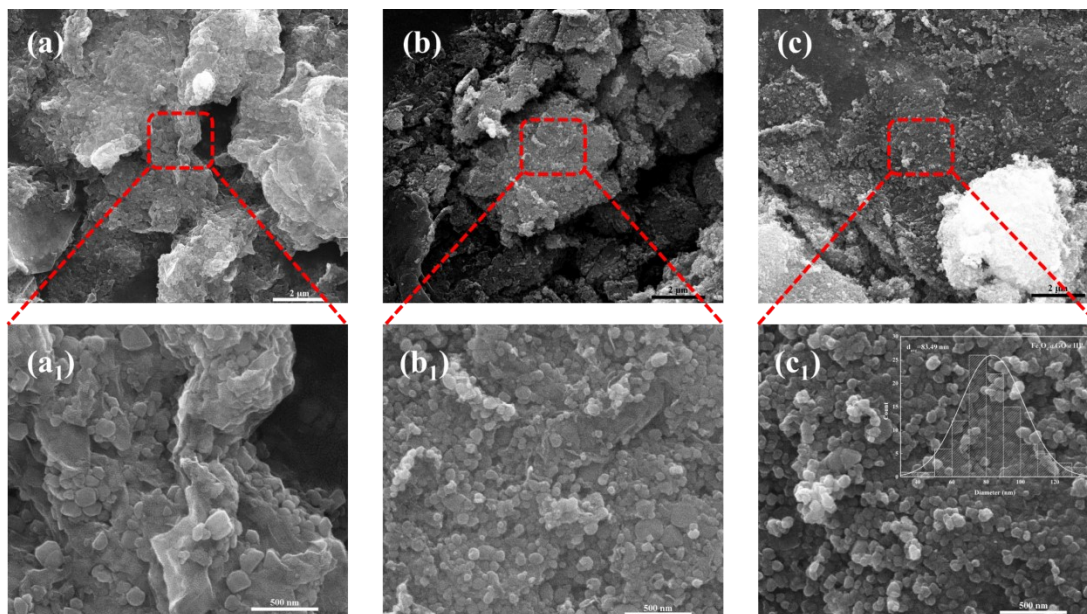

**Fig. S2.** SEM images of  $\text{Fe}_3\text{O}_4@\text{GO}$ ,  $\text{Fe}_3\text{O}_4@\text{GO}@\text{VTMOS}$  and IIP ( $a_1$ ,  $b_1$  and  $c_1$  are enlarged SEM images of a, b, and c, respectively).

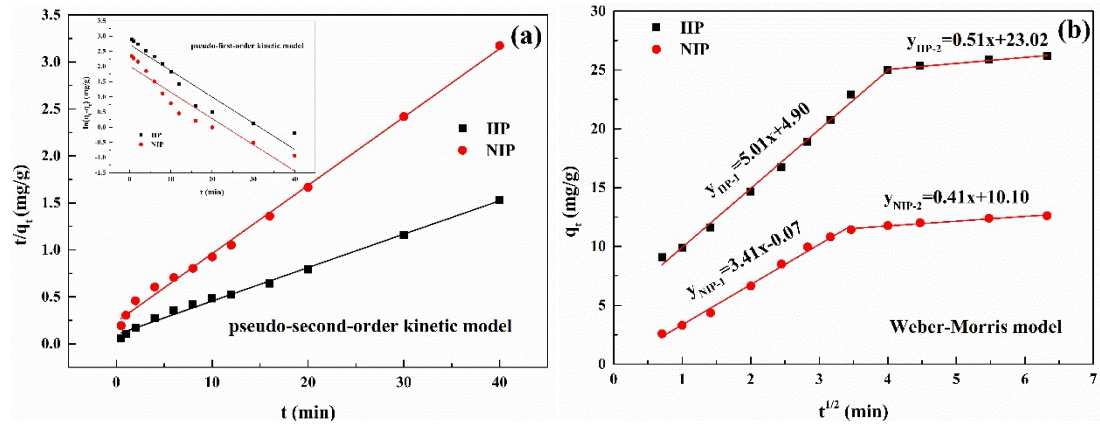

**Fig. S3.** (a) Pseudo-second-order kinetic model (the inset was the Pseudo-first-order kinetic model), (b) Weber-Morris intra-particle diffusion model.

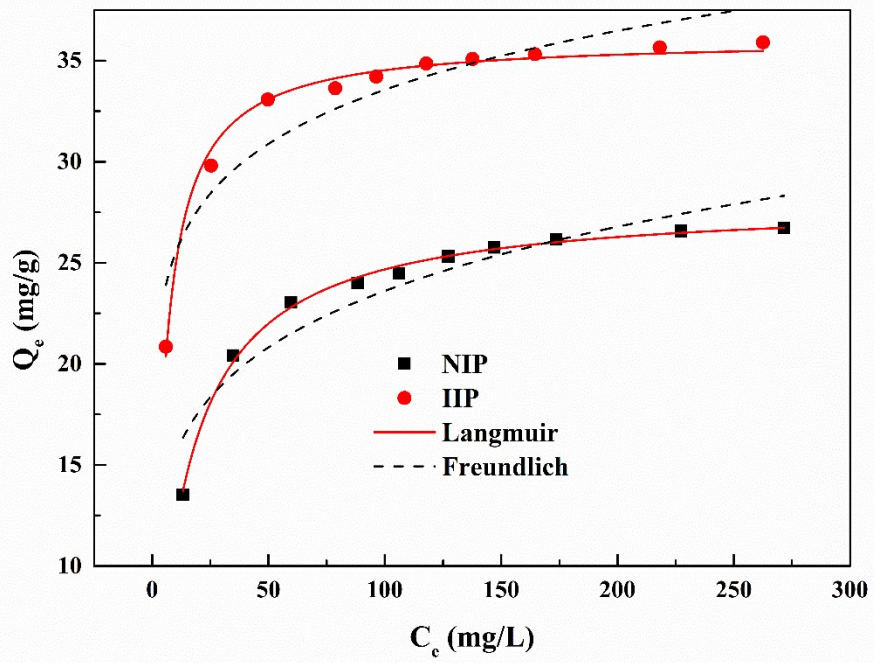

Fig. S4. Langmuir and Freundlich isotherm model.

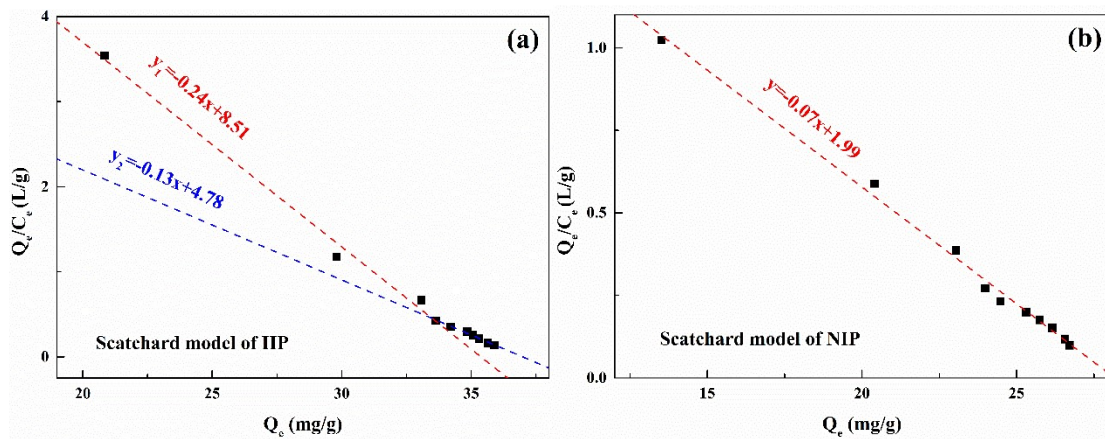

**Fig. S5.** Scatchard model fitting of the IIP (a) and NIP (b).

**Table S1** Results of different component content and solvent preparation.

| Component dosage (mmol)<br>Ni(II)/AMPS/MBA | Solvent (mL)       |         | Magnetism | Adsorption capacity<br>(mg/g) |
|--------------------------------------------|--------------------|---------|-----------|-------------------------------|
|                                            | Distilled<br>water | Ethanol |           |                               |
| 1/2/3                                      | 30                 | -       | Magnetic  | 27.33                         |
|                                            | 10                 | 20      | Magnetic  | 29.13                         |
| 2/4/6                                      | 30                 | -       | Magnetic  | 19.85                         |
|                                            | 10                 | 20      | Magnetic  | 35.31                         |
| 2/8/6                                      | 30                 | -       | -         | 49.52                         |
|                                            | 10                 | 20      | -         | 54.68                         |

**Table S2.** Selectivity parameters of IIP and NIP.

| Metal ion | Distribution ratio |        | Selectivity coefficient |      | Relative selective coefficient ( $k'$ ) |
|-----------|--------------------|--------|-------------------------|------|-----------------------------------------|
|           | $D$ (mL/g)         |        | $(k)$                   |      |                                         |
|           | IIP                | NIP    | IIP                     | NIP  |                                         |
| Ni(II)    | 1312.81            | 337.93 |                         |      |                                         |
| Cd(II)    | 91.97              | 107.00 | 14.27                   | 3.16 | 4.52                                    |
| Co(II)    | 74.71              | 89.39  | 17.57                   | 3.78 | 4.65                                    |
| Cu(II)    | 80.71              | 156.19 | 16.27                   | 2.16 | 7.52                                    |
| Pb(II)    | 120.90             | 195.36 | 10.86                   | 1.73 | 6.28                                    |
| Zn(II)    | 74.40              | 54.31  | 17.65                   | 6.22 | 2.84                                    |
